# Supplementary material for: Soil Nutrient Detection for Precision Agriculture Using Handheld Laser-Induced Breakdown Spectroscopy (LIBS) and Multivariate Regression Methods (PLSR, Lasso and GPR)
Source: PubMed Central journal article supplement (PMC7014682; doi:10.3390/s20020418), 2020-01-11
Supplement: sensors-20-00418-s001.pdf [file sensors-20-00418-s001.pdf]

## Supplementary Material

# Soil Nutrient Detection for Precision Agriculture Using Handheld Laser-Induced Breakdown Spectroscopy (LIBS) and Multivariate Regression Methods (PLSR, Lasso and GPR)

Alexander Erler <sup>1</sup>, Daniel Riebe <sup>1</sup>, Toralf Beitz <sup>1</sup>, Hans-Gerd Löhmannsröben <sup>1,\*</sup> and Robin Gebbers <sup>2</sup>

<sup>1</sup> Physical Chemistry, University of Potsdam, Karl-Liebknecht-Str. 24-25, 14476 Potsdam, Germany; aerler@uni-potsdam.de (A.E.); riebe@uni-potsdam.de (D.R.); beitz@uni-potsdam.de (T.B.)

<sup>2</sup> Leibniz Institute for Agricultural Engineering and Bioeconomy (ATB), Max-Eyth-Allee 100, 14469 Potsdam, Germany

\* Correspondence: loeh@chem.uni-potsdam.de

Received: 20 December 2019; Accepted: 9 January 2020; Published: date

In this supplementary material, the RMSEP of the different soil parameters are provided for the multi-variate methods PLSR, Lasso and GPR (Table S1). Table S1 supplements the coefficients of determination given in Table 2 of the publication.

**Table S1.** Comparison of RMSEP (in ppm, except for humus and pH) of PLSR, Lasso and GPR methods

| Parameter | PLSR  | LASSO | GPR   |
|-----------|-------|-------|-------|
| Ca        | 2560  | 2900  | 2570  |
| Mg        | 311   | 334   | 313   |
| K         | 245   | 258   | 254   |
| N         | 162   | 137   | 162   |
| P         | 80.4  | 76.9  | 73.7  |
| Fe        | 1710  | 1760  | 1880  |
| Mn        | 46.9  | 35.1  | 49.1  |
| Zn        | 6.17  | 7.22  | 7.23  |
| Al        | 1110  | 1220  | 1050  |
| P (pa)    | 3.33  | 3.26  | 3.04  |
| Humus     | 0.270 | 0.238 | 0.276 |
| pH (Ca)   | 0.342 | 0.329 | 0.264 |

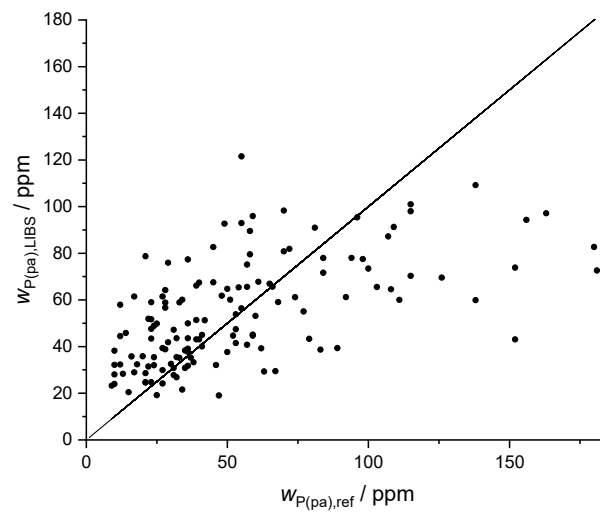

**Figure S1.** Results of 10-fold GPR cross validation for plant available P,  $R^2(P, \text{GPR}) = 0.35$ .
